# Supplementary material for: Highly selective C2H2and CO2capture based on two new ZnII-MOFs and fluorescence sensing of two doped MOFs with EuIII
Source: Royal Society of Chemistry journal article supplement (doi:10.1039/d3ce00068k), 2023-01-01
Supplement: d3ce00068k1.pdf [file d3ce00068k1.pdf]

Electronic Supporting Information

# Highly selective C<sub>2</sub>H<sub>2</sub> and CO<sub>2</sub> capture based on two new Zn<sup>II</sup>-MOFs and fluorescence sensing of two doped MOFs with Eu<sup>III</sup>

Xin-Wei Meng,<sup>a</sup> Tao Ding,<sup>\*a</sup> Bin Liu,<sup>a</sup> Xue-Song Gong,<sup>a</sup> Bo Liu,<sup>a</sup> and Li-Na Zheng<sup>\*a</sup>

<sup>a</sup>*School of Environmental and Chemical Engineering, Xi'an Polytechnic University, Xi'an 710048, P. R. China.*

**Table S1.** Selected Bond Length (Å) and Angles (°) for **Zn-MOF 1-2**

| <b>Zn-MOF 1</b>                                                                                                                                                                                                                  |           |                     |           |
|----------------------------------------------------------------------------------------------------------------------------------------------------------------------------------------------------------------------------------|-----------|---------------------|-----------|
| N11-Zn(1)-O14                                                                                                                                                                                                                    | 101.1(9)  | N11-Zn(1)-O54       | 103.3(9)  |
| O14-Zn(1)-Zn(4)#1                                                                                                                                                                                                                | 73.7(5)   | O14-Zn(1)-O54       | 81.8(10)  |
| O54-Zn(1)-Zn(4)#1                                                                                                                                                                                                                | 76.5(5)   | O25#2-Zn(1)-Zn(4)#1 | 79.7(6)   |
| O25#2-Zn(1)-N11                                                                                                                                                                                                                  | 100.8(9)  | O25#2-Zn(1)-O14     | 96.6(11)  |
| O25#2-Zn(1)-O54                                                                                                                                                                                                                  | 155.7(8)  | O25#2-Zn(1)-O65#2   | 75.4(11)  |
| O65#2-Zn(1)-Zn(4)#1                                                                                                                                                                                                              | 80.1(7)   | O65#2-Zn(1)-N11     | 105.0(10) |
| O65#2-Zn(1)-O14                                                                                                                                                                                                                  | 153.6(9)  | O65#2-Zn(1)-O54     | 95.2(9)   |
| N31-Zn(3)-N23                                                                                                                                                                                                                    | 103.3(10) | N31-Zn(3)-O35       | 95.2(11)  |
| N23-Zn(3)-O35                                                                                                                                                                                                                    | 121.4(10) | O85#3-Zn(3)-N31     | 110.1(13) |
| O85#3-Zn(3)-N23                                                                                                                                                                                                                  | 116.4(12) | O85#3-Zn(3)-O35     | 107.8(11) |
| N21-Zn(2)-N33                                                                                                                                                                                                                    | 106.9(10) | O34#4-Zn(2)-N21     | 113.7(12) |
| O34#4-Zn(2)-N33                                                                                                                                                                                                                  | 110.9(11) | O84#2-Zn(2)-N21     | 112.0(11) |
| O84#2-Zn(2)-N33                                                                                                                                                                                                                  | 104.8(9)  | O84#2-Zn(2)-O34#4   | 108.1(9)  |
| N13-Zn(4)-Zn(1)#5                                                                                                                                                                                                                | 175.2(7)  | O24#5-Zn(4)-Zn(1)#5 | 82.1(6)   |
| N13-Zn(4)-O24#5                                                                                                                                                                                                                  | 101.1(8)  | O24#5-Zn(4)-O64#5   | 93.6(11)  |
| N13-Zn(4)-O64#5                                                                                                                                                                                                                  | 102.8(9)  | O24#5-Zn(4)-O15#6   | 83.0(10)  |
| N13-Zn(4)-O15#6                                                                                                                                                                                                                  | 98.6(9)   | O24#5-Zn(4)-O55#6   | 160.3(8)  |
| N13-Zn(4)-O55#6                                                                                                                                                                                                                  | 98.5(9)   | O64#5-Zn(4)-Zn(1)#5 | 80.4(6)   |
| O15#6-Zn(4)-Zn(1)#5                                                                                                                                                                                                              | 78.2(6)   | O64#5-Zn(4)-O55#6   | 82.8(11)  |
| O15#6-Zn(4)-O64#5                                                                                                                                                                                                                | 158.5(8)  | O15#6-Zn(4)-O55#6   | 93.3(10)  |
| O55#6-Zn(4)-Zn(1)#5                                                                                                                                                                                                              | 78.3(6)   |                     |           |
| Symmetrical codes: #1 x-1, y, z-1; #2 -x+1, y-1/2, -z; #3 -x+2, y-1/2, -z; #4 x, y, z+1; #5 x+1, y, z+1; #6 -x+2, y-1/2, -z+1; #7 x, y, z-1; #8 -x+1, y+1/2, -z; #9 -x+2, y+1/2, -z+1; #10 -x+2, y+1/2, -z for <b>Zn-MOF 1</b> . |           |                     |           |
| <b>Zn-MOF 2</b>                                                                                                                                                                                                                  |           |                     |           |
| N(1)-Zn(1)-Zn(2)                                                                                                                                                                                                                 | 180.0     | N(2)-Zn(2)-Zn(1)    | 180.0     |
| N(1)-Zn(1)-O(3)                                                                                                                                                                                                                  | 99.8(6)   | N(2)-Zn(2)-O(1)     | 102.4(7)  |
| N(1)-Zn(1)-O(4)                                                                                                                                                                                                                  | 100.0(6)  | N(2)-Zn(2)-O(2)     | 98.7(7)   |

|                  |          |                      |          |
|------------------|----------|----------------------|----------|
| N(1)-Zn(1)-O(7)  | 99.4(7)  | N(2)-Zn(2)-O(6)      | 101.4(7) |
| N(1)-Zn(1)-O(9)  | 103.1(6) | N(2)-Zn(2)-O(8)      | 101.4(7) |
| O(3)-Zn(1)-Zn(2) | 80.2(6)  | O(6)-Zn(2)-Zn(1)     | 78.6(7)  |
| O(3)-Zn(1)-O(4)  | 76.5(6)  | O(8)-Zn(2)-Zn(1)     | 80.4(6)  |
| O(4)-Zn(1)-Zn(2) | 80.0(6)  | O(8)-Zn(2)-O(6)      | 77.2(8)  |
| O(7)-Zn(1)-Zn(2) | 80.6(7)  | N(3)-Zn(3)-O(10)     | 60.9(4)  |
| O(9)-Zn(1)-Zn(2) | 76.9(6)  | N(3)-Zn(3)-O(10)#2   | 61.1(4)  |
| O(9)-Zn(1)-O(7)  | 76.9(7)  | N(4)#1-Zn(3)-O(10)#2 | 62.1(4)  |
| O(1)-Zn(2)-Zn(1) | 77.6(7)  | N(4)#1-Zn(3)-O(10)   | 63.1(4)  |
| O(1)-Zn(2)-O(2)  | 79.2(7)  | O(10)-Zn(3)-O(10)#2  | 77.6(4)  |
| O(2)-Zn(2)-Zn(1) | 81.3(7)  |                      |          |

Symmetrical codes: #1 x, -y+1/2, z+1/2, #2 -x+1, -y+1/2, z+0, #3 x, -y+1/2, z-1/2 for **Zn-MOF 2**

**Table S2.** A comparison of various MOF materials used for selective adsorption for C<sub>2</sub>H<sub>2</sub> and CO<sub>2</sub> over CH<sub>4</sub>

| MOFs materials                                                                                                                             | IAST calculated selectivity                    |                                  | Ref.      |
|--------------------------------------------------------------------------------------------------------------------------------------------|------------------------------------------------|----------------------------------|-----------|
|                                                                                                                                            | C <sub>2</sub> H <sub>2</sub> /CH <sub>4</sub> | CO <sub>2</sub> /CH <sub>4</sub> |           |
| {[Cu <sub>4</sub> (L) <sub>2</sub> (H <sub>2</sub> O) <sub>4</sub> ]·4DMF·8H <sub>2</sub> O} <sub>n</sub>                                  |                                                | 3.2                              | 43        |
| ZJNU-63                                                                                                                                    | 13.1                                           | 3.5                              | 44        |
| Sc-ABTC                                                                                                                                    | 14.7                                           |                                  | 45        |
| {[Co <sub>6</sub> (μ <sub>3</sub> -OH) <sub>4</sub> (Ina) <sub>8</sub> ](H <sub>2</sub> O) <sub>10</sub> (DMA) <sub>2</sub> ] <sub>n</sub> | 9.6                                            |                                  | 46        |
| ZJU-16a                                                                                                                                    | 7.5                                            |                                  | 47        |
| {[Zn <sub>3</sub> (dbba) <sub>2</sub> (bipy)(DMF)]·3DMF·4H <sub>2</sub> O} <sub>n</sub>                                                    |                                                | 4                                | 48        |
| {[Co <sub>3</sub> (L)(OH) <sub>2</sub> (H <sub>2</sub> O) <sub>4</sub> ]·2DMF·2H <sub>2</sub> O} <sub>n</sub>                              | 13                                             | 4                                | 49        |
| SNNU-5-In                                                                                                                                  | 10                                             | 3.9                              | 50        |
| <b>Zn-MOF 1</b>                                                                                                                            | 15.1                                           | 6.8                              | This work |
| <b>Zn-MOF 1</b>                                                                                                                            | 14.2                                           | 6.5                              | This work |

**Table S3** Comparison the K<sub>sv</sub> of Eu@Zn-MOF 1 and Eu@Zn-MOF 2 towards Fe<sup>3+</sup> ions with other materials.

| Materials                                                                               | Solvent            | K <sub>sv</sub> (M <sup>-1</sup> ) | Ref. |
|-----------------------------------------------------------------------------------------|--------------------|------------------------------------|------|
| Bis(rhodamine)-1                                                                        | CH <sub>3</sub> CN | 7.50 × 10 <sup>3</sup>             | 51   |
| Bis(rhodamine)-2                                                                        | CH <sub>3</sub> CN | 5.10 × 10 <sup>3</sup>             | 51   |
| BUT-14                                                                                  | H <sub>2</sub> O   | 2.17 × 10 <sup>3</sup>             | 52   |
| BUT-15                                                                                  | H <sub>2</sub> O   | 1.66 × 10 <sup>4</sup>             | 52   |
| Eu <sup>3+</sup> @MIL-53-COOH (Al)                                                      | H <sub>2</sub> O   | 5.12 × 10 <sup>3</sup>             | 53   |
| Ln(cpty) <sub>3</sub>                                                                   | H <sub>2</sub> O   | 4.10 × 10 <sup>3</sup>             | 54   |
| Benzimidazole-based sensor                                                              | H <sub>2</sub> O   | 8.51 × 10 <sup>4</sup>             | 55   |
| FJU-13a-Eu                                                                              | H <sub>2</sub> O   | 2.03 × 10 <sup>4</sup>             | 56   |
| Eu <sub>2</sub> (MFDA) <sub>2</sub> (HCOO) <sub>2</sub> (H <sub>2</sub> O) <sub>6</sub> | DMF                | 1.58 × 10 <sup>3</sup>             | 57   |

|                                     |                                    |                    |           |
|-------------------------------------|------------------------------------|--------------------|-----------|
| Tb-DSOA                             | H <sub>2</sub> O                   | $3.54 \times 10^3$ | 58        |
| Eu(atpt)1.5(phen)(H <sub>2</sub> O) | CH <sub>3</sub> CH <sub>2</sub> OH | $7.60 \times 10^3$ | 59        |
| <b>Eu@Zn-MOF 1</b>                  | H <sub>2</sub> O                   | $1.53 \times 10^4$ | This work |
| <b>Eu@Zn-MOF 2</b>                  | H <sub>2</sub> O                   | $1.43 \times 10^4$ | This work |

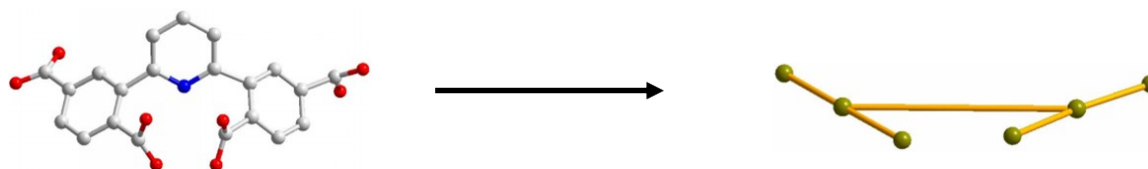

**Figure S1.** The L<sup>4</sup> ligand viewed as two 3-c nodes.

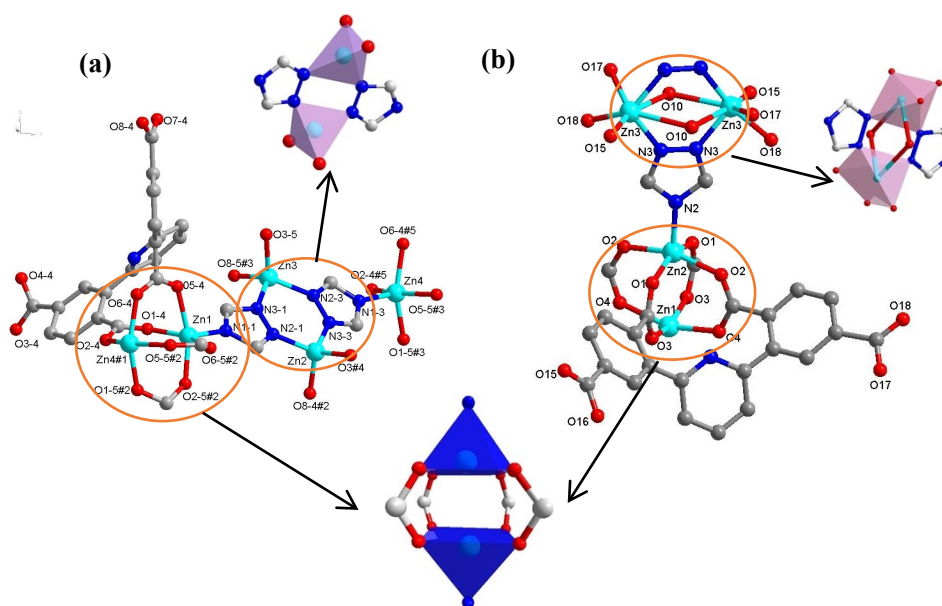

**Figure S2.** Single-crystal structure of 1. (a) Coordination environments of Zn ions in **Zn-MOF 1**. The hydrogen atoms are omitted for clarity. #1  $x-1, y, z-1$ ; #2  $-x+1, y-1/2, -z$ ; #3  $-x+2, y-1/2, -z$ ; #4  $x, y, z+1$ ; #5  $x+1, y, z+1$ ; (b) Coordination environments of Zn ions in **Zn-MOF 2**. The hydrogen atoms are omitted for clarity. #1  $x, -y+1/2, z+1/2$  #2  $-x+1, -y+1/2, z+0$  #3  $x, -y+1/2, z-1/2$ .

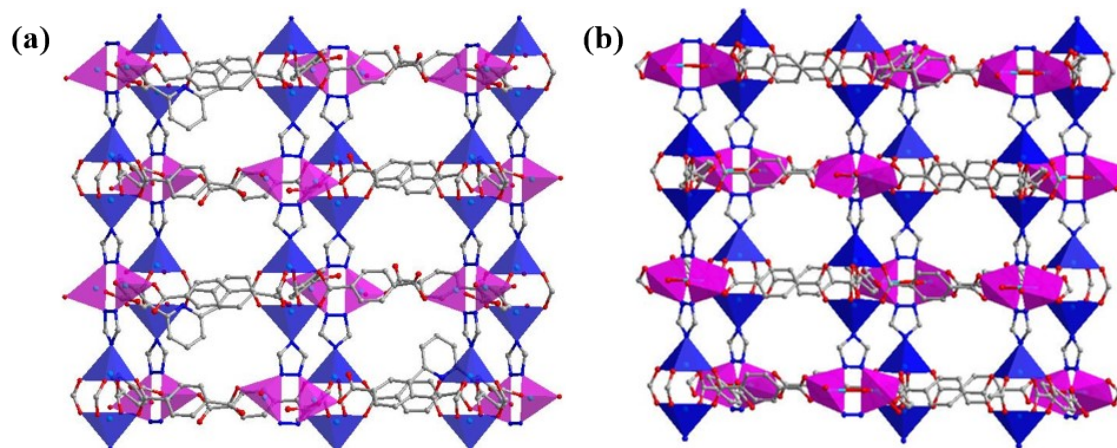

**Figure S3.** 2D double-layer of Zn-MOF 1 (a), Zn-MOF 2 (b).

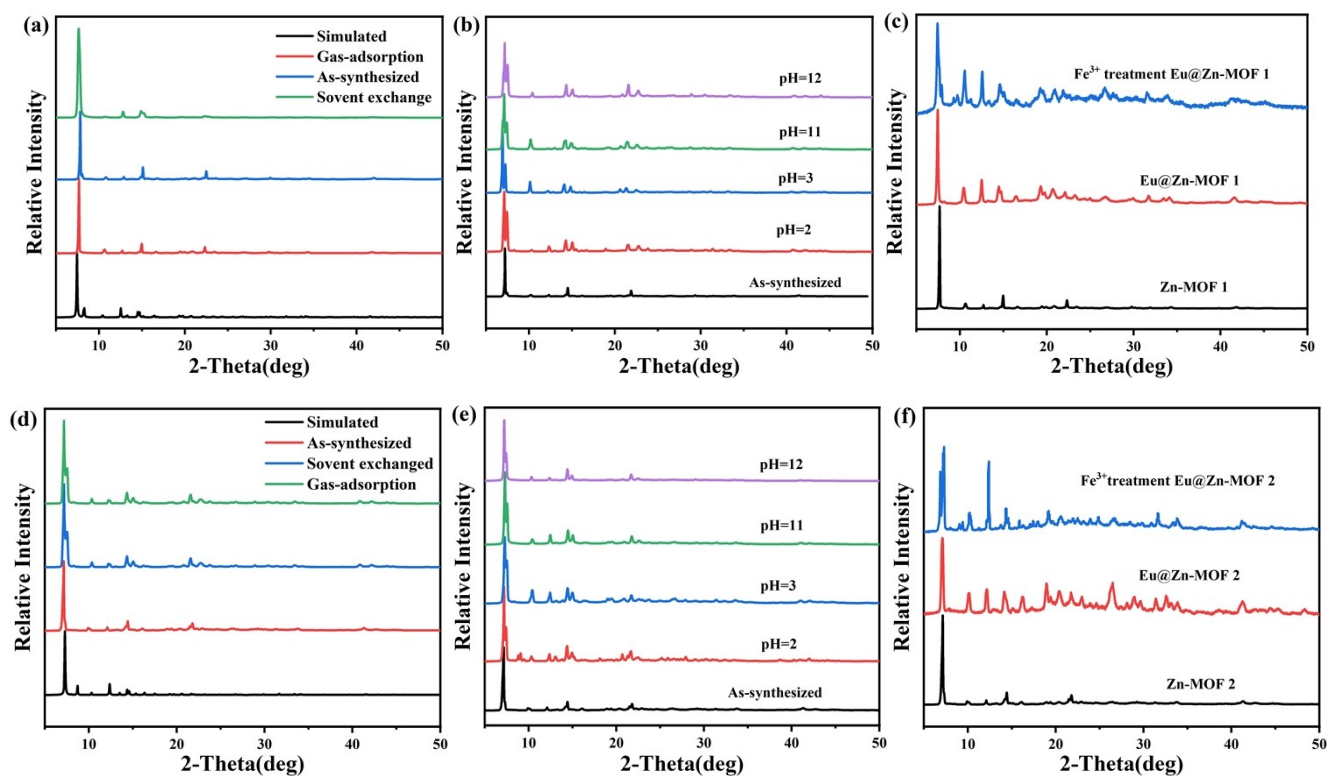

**Figure S4.** PXRD patterns. Simulated, as-synthesized, Gas-adsorption and Solvent exchanged of Zn-MOF 1 (a) and Zn-MOF 2 (d). After being soaked in acidic and basic solutions for different time periods of Zn-MOF 1 (b) and Zn-MOF 2 (e). Before and after immersion in Fe<sup>3+</sup> of Eu@Zn-MOF 1 (c) and Eu@Zn-MOF 2 (f).

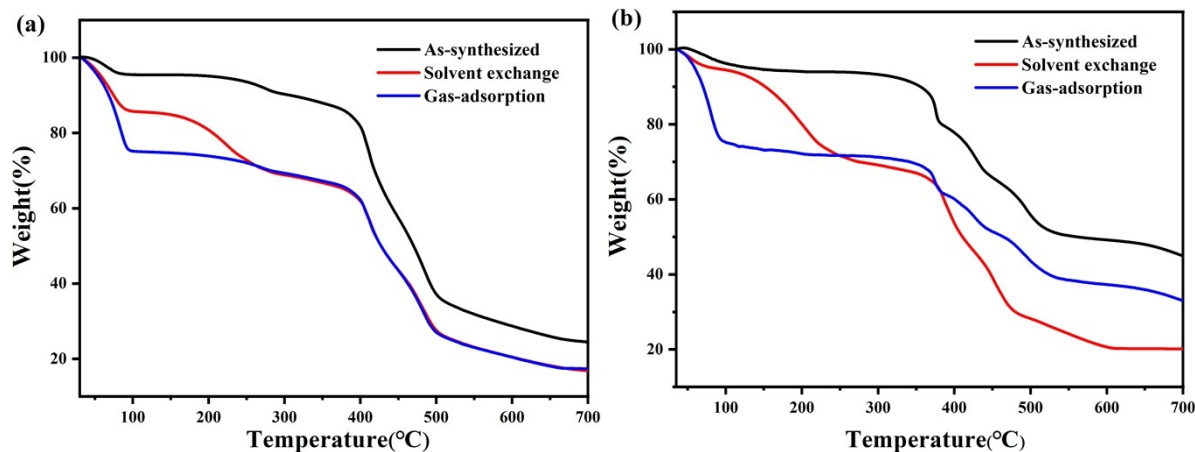

**Figure S5.** TGA for Zn-MOF 1 (a) and Zn-MOF 2 (b): As-synthesized, exchanged and Gas-adsorption samples.

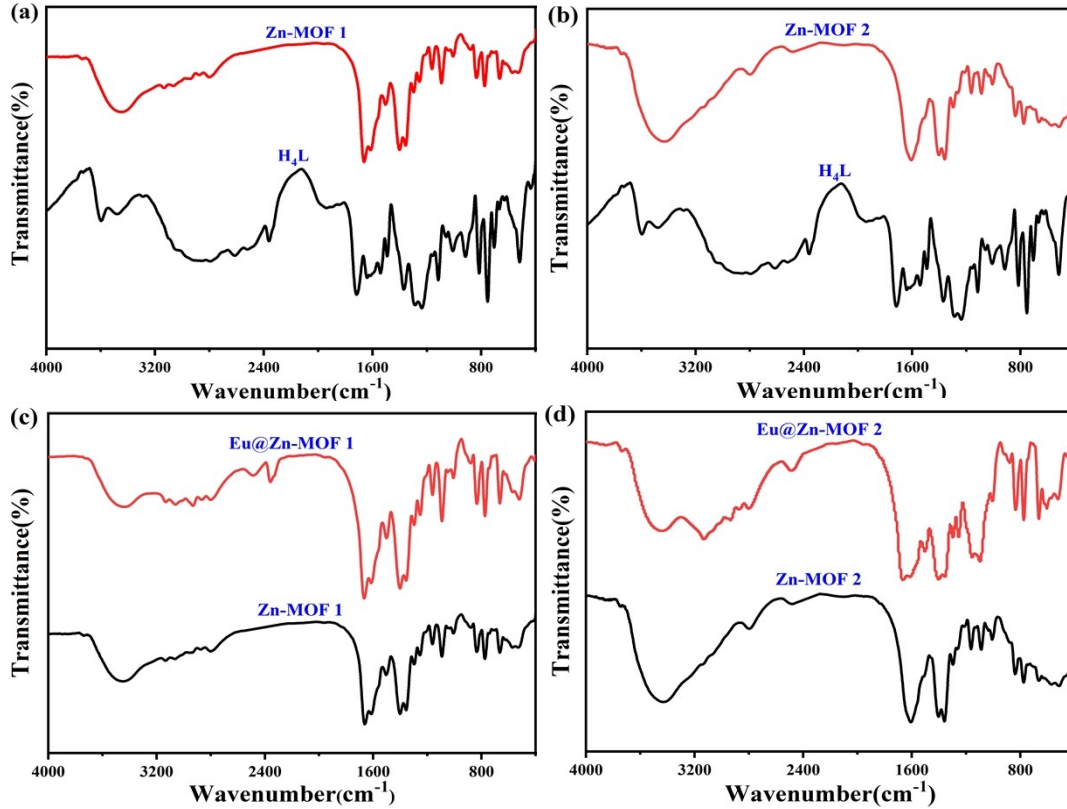

**Figure S6.** IR for (a) **Zn-MOF 1**, (b) **Eu@Zn-MOF 1**, (c) **Zn-MOF 2**, (d) **Eu@Zn-MOF 2**: ligand and as-synthesized samples.

### IAST adsorption selectivity calculation

The experimental isotherm data for pure CO<sub>2</sub>, CH<sub>4</sub> and C<sub>2</sub>H<sub>2</sub> (measured at 298 K) were fitted using a Langmuir-Freundlich (L-F) model.

$$q = \frac{a \times b \times p^c}{1 + b \times p^c}$$

Where  $q$  and  $p$  are adsorbed amounts and pressures of component  $i$ , respectively. The adsorption selectivities for binary mixtures of CO<sub>2</sub>/CH<sub>4</sub> at 273 and 298 K and C<sub>2</sub>O<sub>2</sub>/CH<sub>4</sub> at 298K, defined by

Where  $q_i$  is the amount of  $i$  adsorbed and  $p_i$  is the partial pressure of  $i$  in the mixture.

$$S_{\text{ads}} = \frac{q_1/q_2}{p_1/p_2}$$

**Figure S7.** (a) The consistency plot, (c) BET surface area plot, and (e) Langmuir surface area plot for **Zn-MOF 1**, (b) The consistency plot, (d) BET surface area plot, and (f) Langmuir surface area plot for **Zn-MOF 2**.

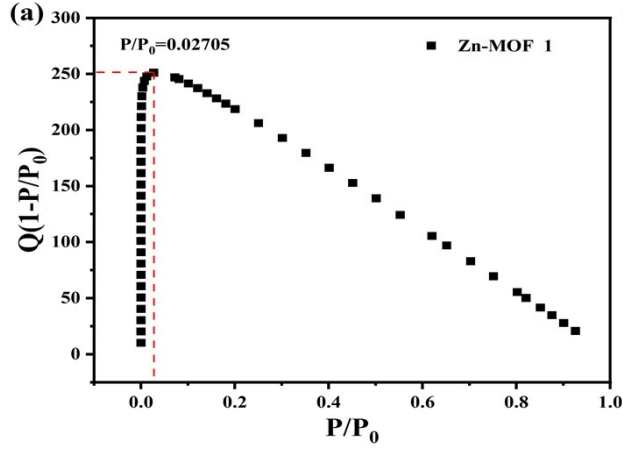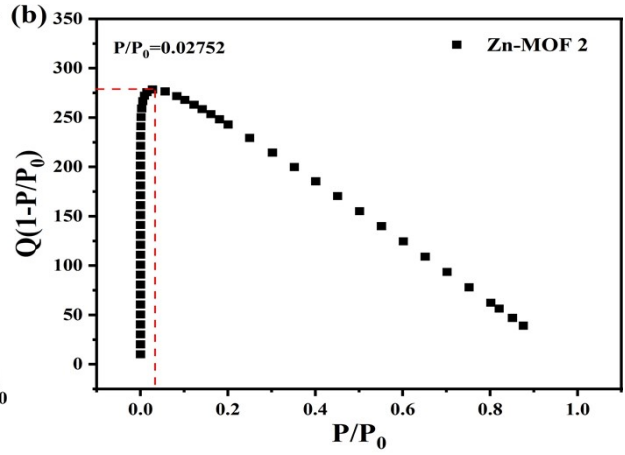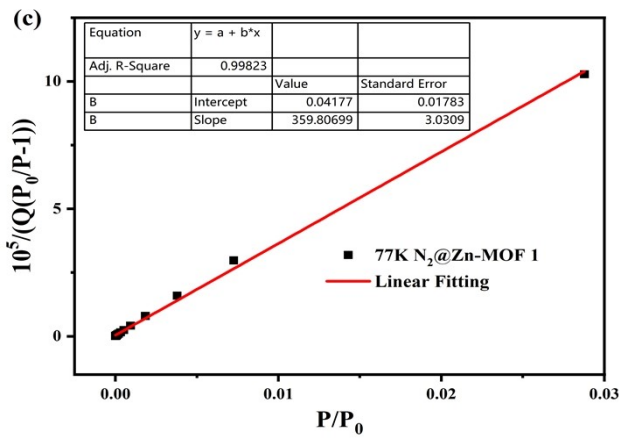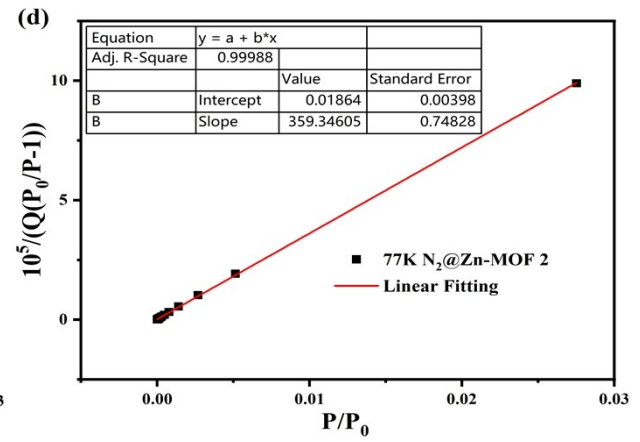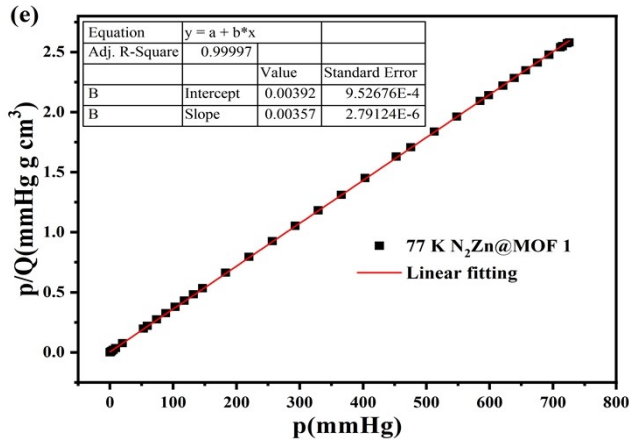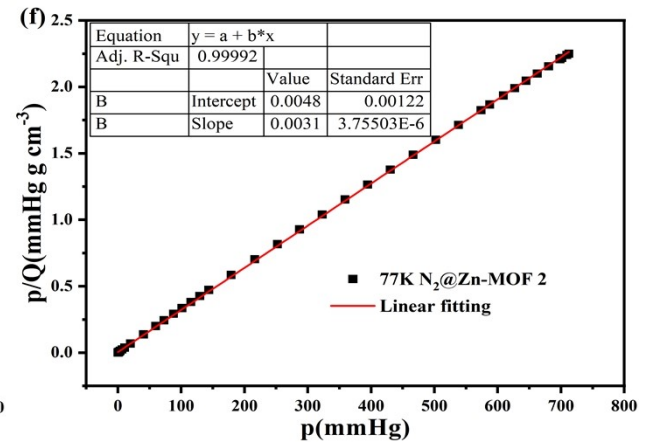

$$S_{\text{BET}} = 1 / (0.042 \times 10^{-6} + 359.82) \times 10^5 / 22414 \times 6.023 \times 10^{23} \times 0.162 \times 10^{-18} = 1209.83 \text{ m}^2 \text{ g}^{-1}$$

$$S_{\text{Langmuir}} = (1 / 0.00357) / 22414 \times 6.023 \times 10^{23} \times 0.162 \times 10^{-18} = 1219.38 \text{ m}^2 \text{ g}^{-1}$$

$$\text{BET constant } C = 1 + 359.81 / 0.042 \times 10^5 \times 10^{-6} = 857.69$$

$$(P/P_0)_{\text{nm}} = \frac{1}{\sqrt{C} + 1} = 0.033018$$



$$S_{\text{BET}} = 1 / (0.019 \times 10^{-6} + 359.35) \times 10^5 / 22414 \times 6.023 \times 10^{23} \times 0.162 \times 10^{-18} = 1211.41 \text{ m}^2 \text{ g}^{-1}$$

$$S_{\text{Langmuir}} = (1 / 0.0031) / 22414 \times 6.023 \times 10^{23} \times 0.162 \times 10^{-18} = 1404.27 \text{ m}^2 \text{ g}^{-1}$$

$$\text{BET constant } C = 1 + 359.35 / 0.042 \times 10^5 \times 10^{-6} = 856.60$$

$$(P / P_0)_{\text{nm}} = \frac{1}{\sqrt{C + 1}} = 0.032983$$

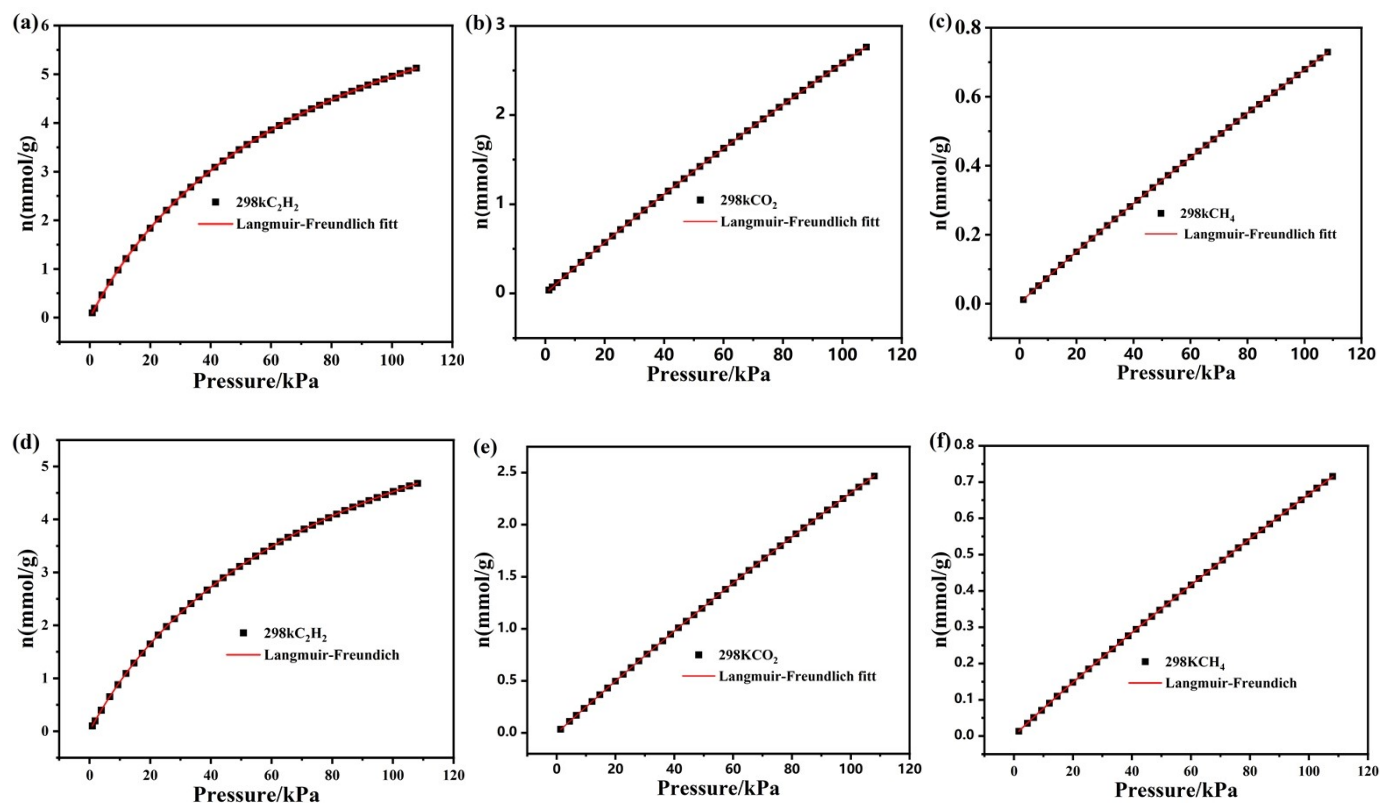

**Figure S8.** (a)  $\text{C}_2\text{H}_2$  adsorption isotherms of **Zn-MOF 1** at 298 K with fitting by L-F model:  $a = 8.84199$ ,  $b = 0.01393$ ,  $c = 0.01892$ ,  $\text{Chi}^2 = 5.41538\text{E-}6$ ,  $\text{R}^2 = 1.00000$ ; (b)  $\text{CO}_2$  adsorption isotherms of **Zn-MOF 1** at 298 K with fitting by L-F model:  $a = 23.4444$ ,  $b = 0.00127$ ,  $c = 0.00587$ ,  $\text{Chi}^2 = 2.36173\text{E-}6$ ,  $\text{R}^2 = 1.00000$ ; (c)  $\text{CH}_4$  adsorption isotherms of **Zn-MOF 1** at 298 K with fitting by L-F model:  $a = 13.12646$ ,  $b = 6.55114\text{E-}4$ ,  $c = 0.04004$ ,  $\text{Chi}^2 = 2.72873\text{E-}7$ ,  $\text{R}^2 = 0.9999$ ; (d)  $\text{C}_2\text{H}_2$  adsorption isotherms of **Zn-MOF 2** at 298 K with fitting by L-F model:  $a = 8.4592$ ,  $b = 0.01342$ ,  $c = 0.0337$ ,  $\text{Chi}^2 = 3.49595\text{E-}6$ ,  $\text{R}^2 = 1.00000$ ; (e)  $\text{CO}_2$  adsorption isotherms of **Zn-MOF 2** at 298 K with fitting by L-F model:  $a = 21.34253$ ,  $b = 0.00116$ ,  $c = -0.00884$ ,  $\text{Chi}^2 = 1.6233\text{E-}6$ ,  $\text{R}^2 = 1.00000$ ; (f)  $\text{CH}_4$  adsorption isotherms of **Zn-MOF 2** at 298 K with fitting by L-F model:  $a = 12.09448$ ,  $b = 6.88961\text{E-}4$ ,  $c = 0.03614$ ,  $\text{Chi}^2 = 1.10292\text{E-}7$ ,  $\text{R}^2 = 1.0000$ ;

### Calculation of sorption heat for $\text{C}_2\text{H}_2$ and $\text{CO}_2$ uptakes using Virial 2 model

The above equation was applied to fit the combined  $\text{C}_2\text{H}_2$  and  $\text{CO}_2$  and isotherm data for desolvated 1 at

273 and 298 K, where  $P$  is the pressure,  $N$  is the adsorbed amount,  $T$  is the temperature,  $a_i$  and  $b_i$  are virial coefficients, and  $m$  and  $n$  are the number of coefficients used to describe the isotherms.  $Q_{st}$  is the coverage-dependent enthalpy of adsorption and  $R$  is the universal gas constant.

$$\ln p = \ln N + 1/T \sum_{i=0}^m a_i N^i + \sum_{i=0}^n b_i N^i Q_{st} = -R \sum_{i=0}^m a_i N^i$$

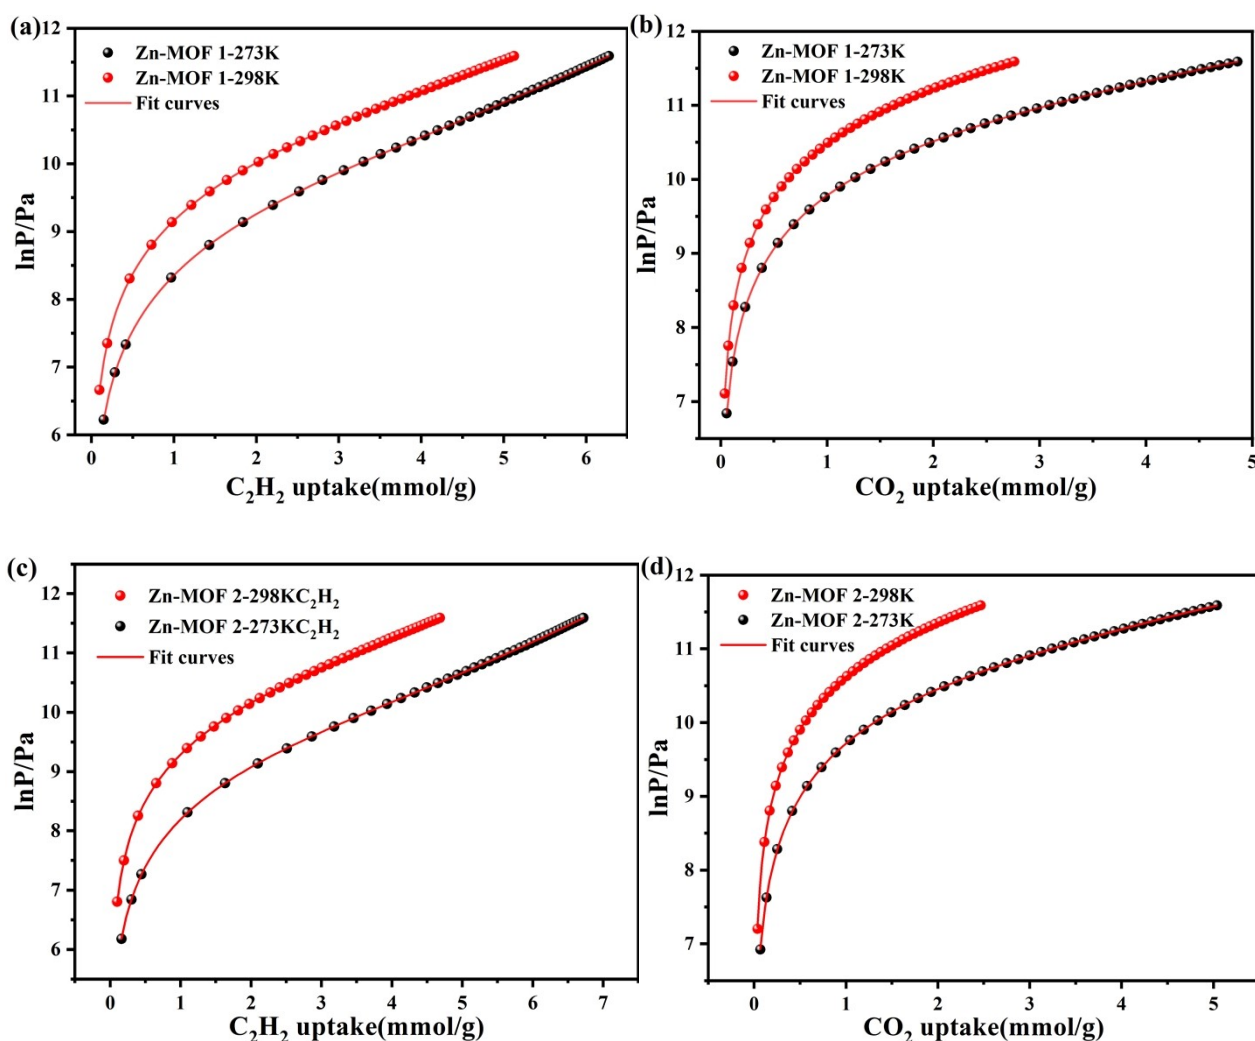

**Figure S9.** (a) Virial analysis of the  $\text{C}_2\text{H}_2$  adsorption data at 298 K and 273 K for **Zn-MOF 1**. Fitting results:

$A_0 = -2862.81452$ ,  $A_1 = 286.59277$ ,  $A_2 = -55.76345$ ,  $A_3 = 6.96046$ ,  $A_4 = -0.15284$ ,  $\text{Chi}^2 = 5.35045\text{E-}6$ ,

$R^2 = 1$ ,  $B_0 = 18.5486$ ,  $B_1 = -0.74012$ ,  $B_2 = 0.14685$ ,  $B_3 = -0.01399$ ; (b) Virial analysis of the  $\text{CO}_2$

adsorption data at 298 K and 273 K for **Zn-MOF 1**. Fitting results:  $A_0 = -2170.06756$ ,  $A_1 = -254.82424$ ,

$A_2 = 154.06248$ ,  $A_3 = -30.59728$ ,  $A_4 = -0.25843$ ,  $\text{Chi}^2 = 2.30489\text{E-}5$ ,  $R^2 = 0.99998$   $B_0 = 17.66738$ ,  $B_1$

$= 1.02847$ ,  $B_2 = -0.60576$ ,  $B_3 = 0.12369$ ; (c) Virial analysis of the  $\text{C}_2\text{H}_2$  adsorption data at 298 K and 273

K for **Zn-MOF 2**. Fitting results:  $A_0 = -3647.84636$ ,  $A_1 = 117.62901$ ,  $A_2 = -37.56691$ ,  $A_3 = 4.22109$ ,  $A_4$



= -0.09628,  $\chi^2 = 5.97073 \times 10^{-6}$ ,  $R^2 = 1$ ;  $B_0 = 21.32644$ ,  $B_1 = -0.16174$ ,  $B_2 = 0.09364$ ,  $B_3 = -0.00673$ , (d)

Virial analysis of the CO<sub>2</sub> adsorption data at 298 K and 273 K for **Zn-MOF 2**. Fitting results:  $A_0 = 3023.00731$ ,  $A_1 = -83.10174$ ,  $A_2 = -7.2069$ ,  $A_3 = 12.87007$ ,  $A_4 = -0.34707$ ,  $\chi^2 = 1.54628 \times 10^{-5}$ ,  $R^2 = 0.99999$   $B_0 = -0.51505$ ,  $B_1 = 0.4125$ ,  $B_2 = -0.03495$ ,  $B_3 = -0.02818$

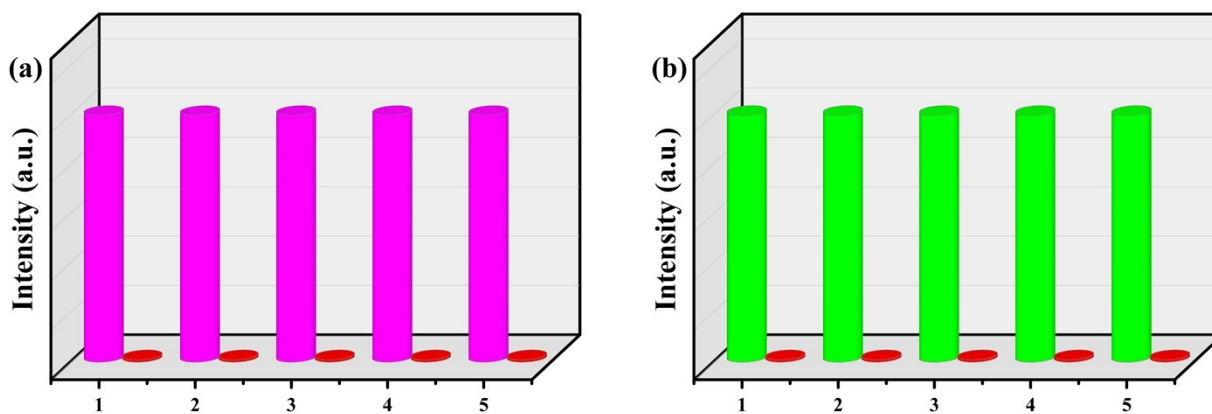

**Figure S10.** Comparison of fluorescence properties of **Eu@Zn-MOF 1** (a) and **Eu@Zn-MOF 2** (b) before and after recovery.

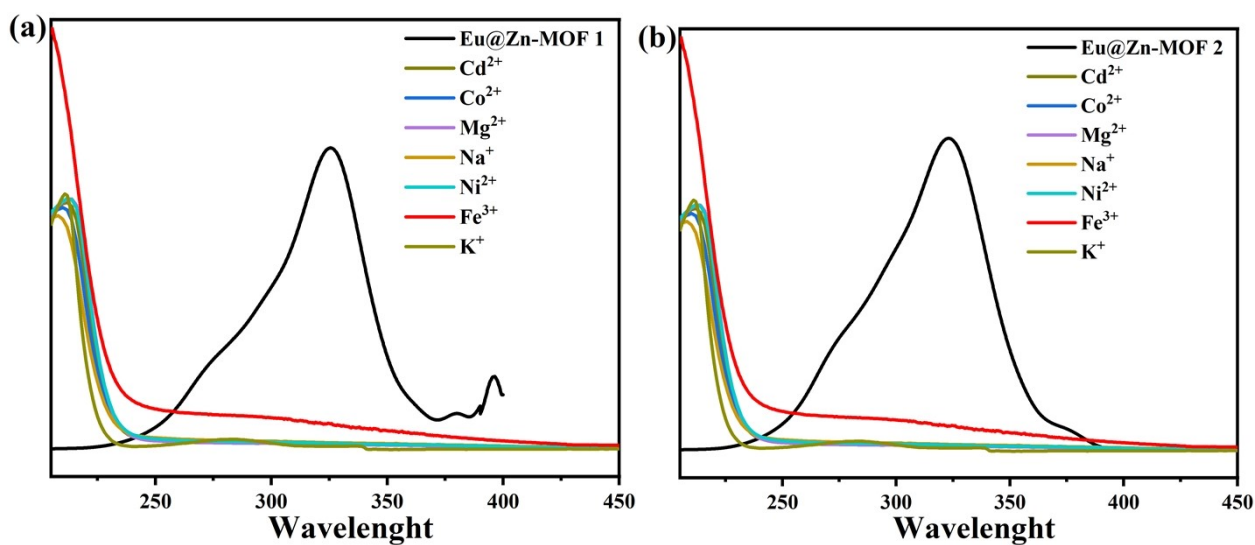

**Figure S11.** UV-vis adsorption spectra of  $M(\text{NO}_3)_x$  aqueous solutions and the excitation spectrum of **Eu@Zn-MOF 1** (a) and **Eu@Zn-MOF 2** (b).

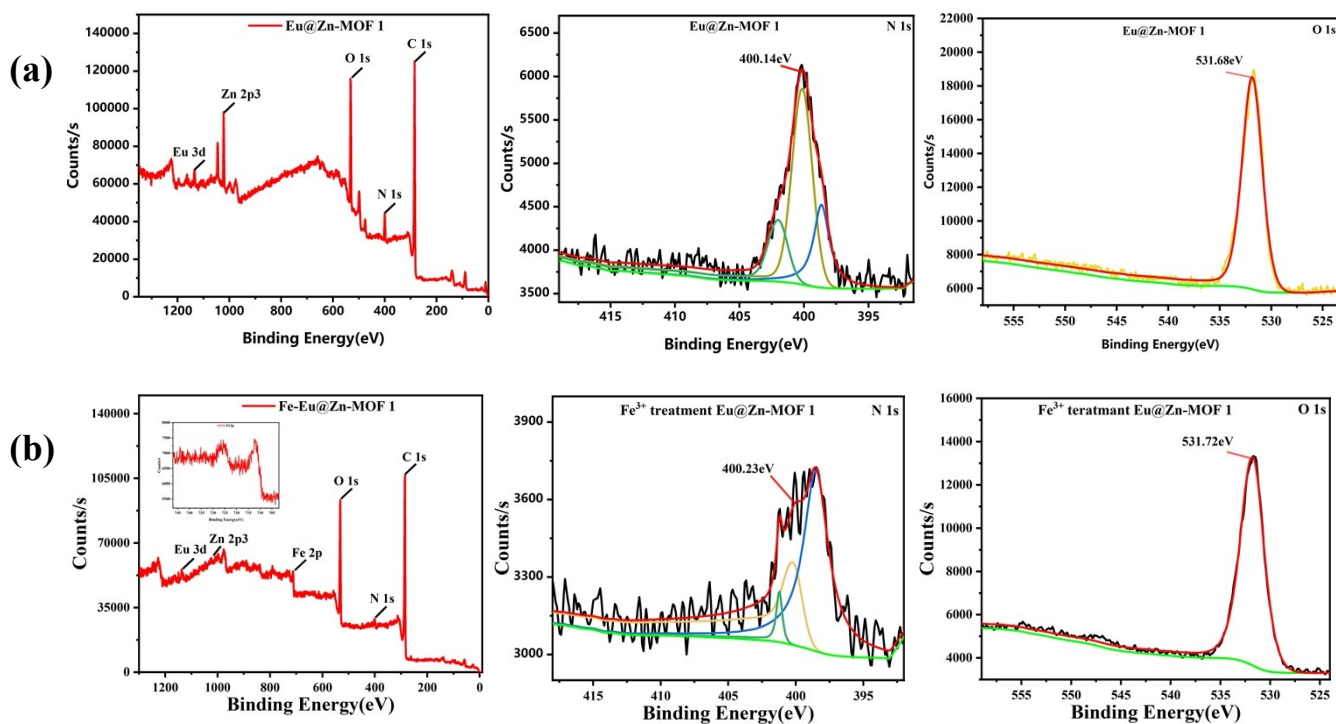

**Figure S12.** Comparison of the XPS spectra of Eu@Zn-MOF 1 before (a) and after (b) treatment with Fe<sup>3+</sup> ions: overall spectra (left); N1s (middle); O1s(right).

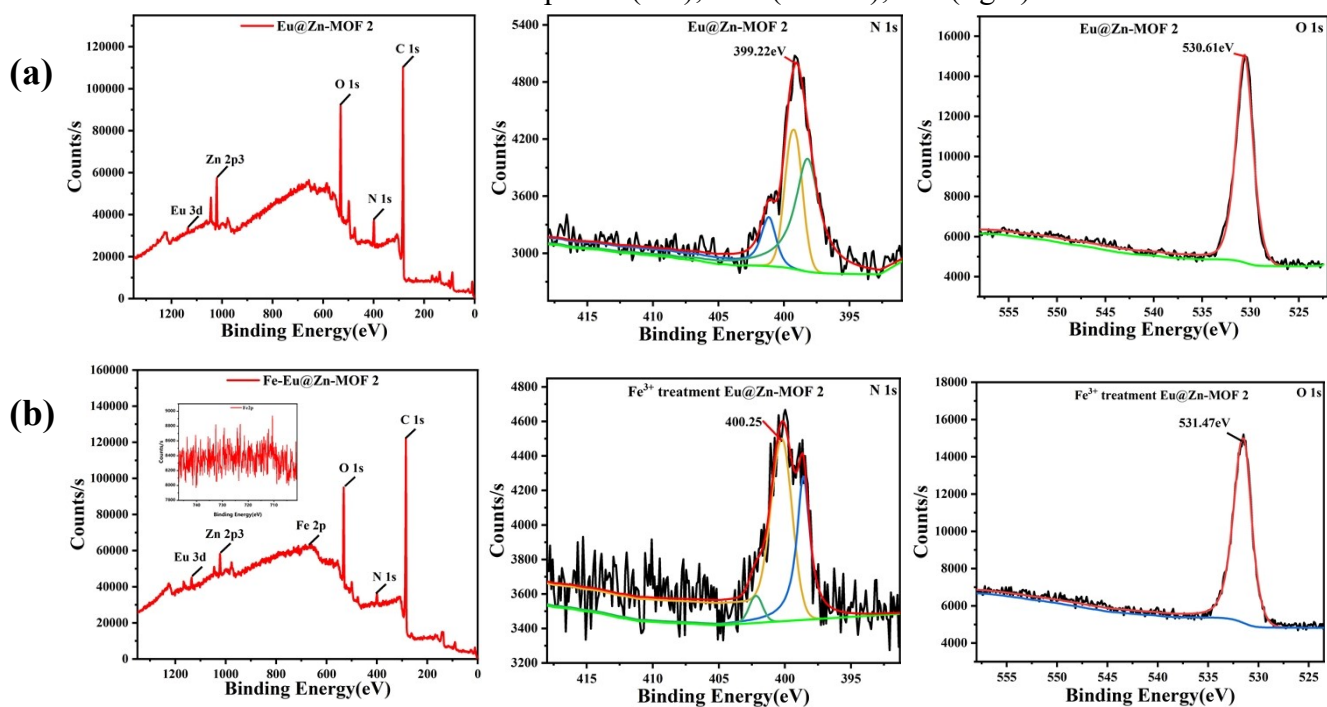

**Figure S13.** Comparison of the XPS spectra of Eu@Zn-MOF 2 before (a) and after (b) treatment with Fe<sup>3+</sup> ions: overall spectra (left); N1s (middle); O1s (right)
